# Supplementary material
Source: Springer Nature journal article supplement (https://www.springermedizin.de/resource/supplementary/12963_2010_133_MOESM6_ESM.pdf/9572732)

**a. Males**

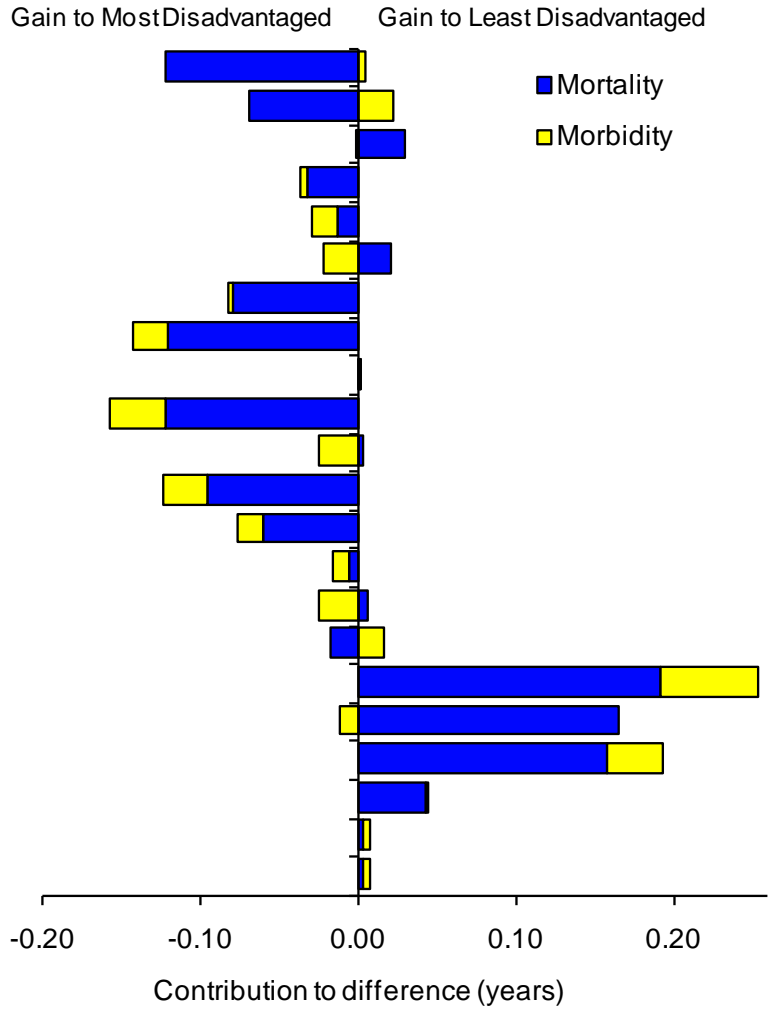

**b. Females**

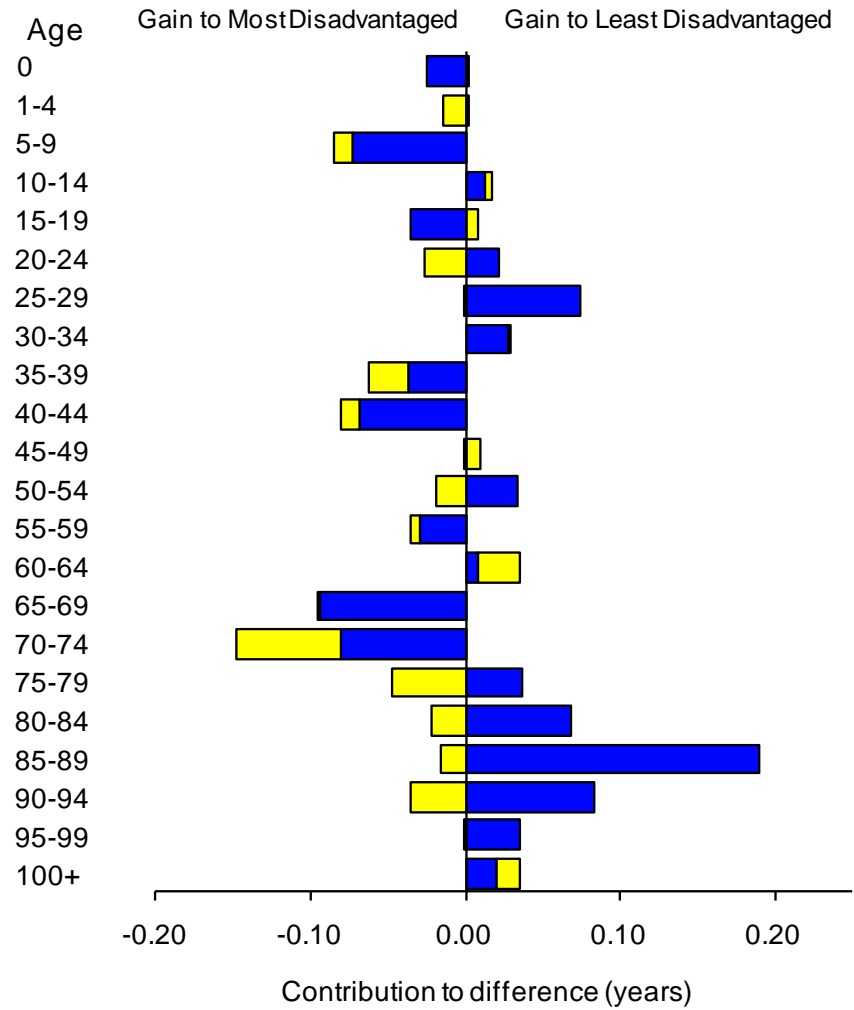

Supplement: MOESM6 [file 9572732]
